# Supplementary material for: Volume shrinkage of a metal–organic framework host induced by the dispersive attraction of guest gas molecules
Source: Royal Society of Chemistry journal article supplement (doi:10.1039/c3cp53256a), 2013-09-10
Supplement: c3cp53256a.pdf [file c3cp53256a.pdf]

# Electronic Supplementary Information (ESI)

## **Volume shrinkage of metal organic framework host induced by the dispersive attraction of guest gas molecules**

Jaeyong Joo,<sup>a</sup> Hyungjun Kim<sup>\*b</sup> and Sang Soo Han<sup>\*a</sup>

<sup>a</sup> *Center for Computational Science, Korea Institute of Science and Technology (KIST),  
Seoul 136-791, Republic of Korea. E-mail: sangsoo@kist.re.kr*

<sup>b</sup> *Graduate School of EEWS, Korea Advanced Institute of Science and Technology, Daejeon 305-  
701, Republic of Korea. E-mail: linus16@kaist.ac.kr*

**A comparison of the DFT-*ulg* method (PBE-*ulg*) with a post Hartree-Fock calculation such as Møller-Plesset perturbation (MP2)**

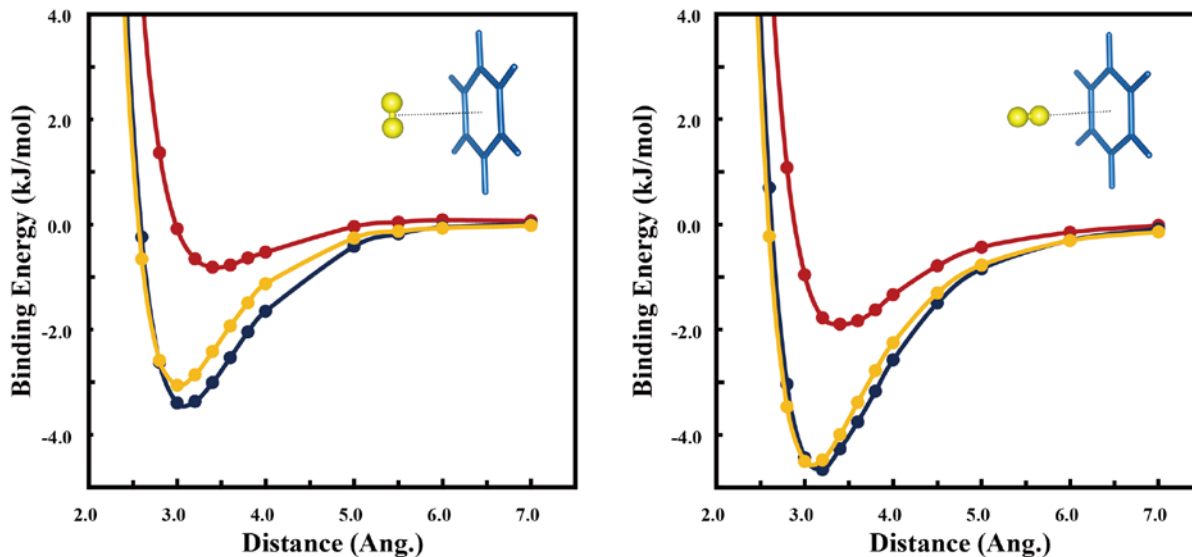

Fig. S1. Calculated  $\text{H}_2\text{-C}_6\text{H}_6$  binding energies for the parallel (left) and vertical (right) configurations by PBE (red), PBE-*ulg* (blue), and MP2 (yellow) with a basis set of cc-pVQZ. The MP2 calculations were performed with the Q-CHEM software.

Variations of bonds and angles in MOF-5 after H<sub>2</sub> adsorption

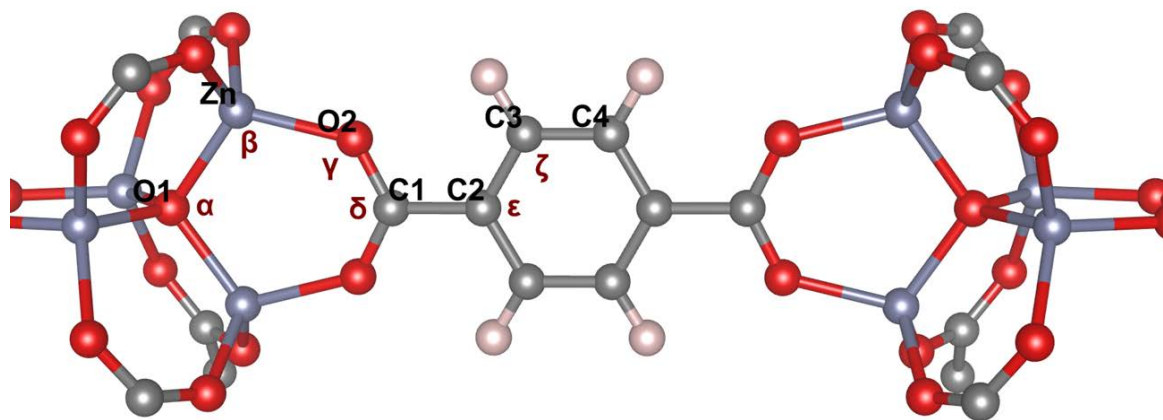

Fig. S2. Bonds and angles in MOF-5

Table S1. Variations of bonds in MOF-5 after H<sub>2</sub> adsorption, where the codes are in Fig. S2.

| H <sub>2</sub> adsorption | O1-Zn | Zn-O2 | O2-C1 | C1-C2 | C2-C3 | C3-C4 |
|---------------------------|-------|-------|-------|-------|-------|-------|
| No adsorption (Å)         | 1.967 | 1.967 | 1.277 | 1.495 | 1.403 | 1.391 |
| Site 1 (%)                | 0.0   | -0.1  | 0.0   | -0.1  | 0.0   | 0.0   |
| Site 1+2 (%)              | 0.0   | -0.1  | 0.0   | -0.1  | 0.0   | 0.0   |
| Site 1+2+3 (%)            | -0.4  | -0.3  | 0.0   | -0.3  | 0.0   | -0.1  |
| Site 1+2+3+4 (%)          | -0.4  | -0.5  | 0.0   | -0.4  | -0.1  | -0.1  |

Table S2. Variations of angles in MOF-5 after H<sub>2</sub> adsorption, where the codes are in Fig. S2.

| H <sub>2</sub> adsorption | $\alpha$ | $\beta$ | $\gamma$ | $\delta$ | $\epsilon$ | $\zeta$ |
|---------------------------|----------|---------|----------|----------|------------|---------|
| No adsorption (°)         | 109.48   | 111.52  | 130.61   | 126.25   | 119.95     | 120.02  |
| Site 1 (%)                | 0.0      | 0.0     | 0.0      | 0.0      | 0.1        | 0.0     |
| Site 1+2 (%)              | 0.0      | 0.0     | 0.0      | 0.0      | 0.1        | 0.0     |
| Site 1+2+3 (%)            | 0.0      | 0.1     | 0.0      | -0.1     | 0.2        | -0.1    |
| Site 1+2+3+4 (%)          | 0.0      | 0.1     | -0.2     | 0.1      | 0.3        | -0.1    |

Table S3. Variations of Bader charges in MOF-5 after H<sub>2</sub> adsorption, where the codes are in Fig. S2.

| H <sub>2</sub> adsorption | O1      | Zn     | O2      | C1     | C2      | C3     |
|---------------------------|---------|--------|---------|--------|---------|--------|
| No adsorption (e)         | -0.1500 | 1.2909 | -1.1523 | 1.5379 | -0.0265 | 0.0488 |
| Site 1 (e)                | -1.1491 | 1.2884 | -1.1520 | 1.5387 | -0.0245 | 0.1103 |
